# Supplementary figures and images for: NRF2 regulates the sensitivity of human NSCLC cells to cystine deprivation-induced ferroptosis via FOCAD-FAK signaling pathway
Source: PubMed Central journal article supplement — Redox Biol. 2020 Aug 27;37:101702. doi: 10.1016/j.redox.2020.101702 (PMC7486457; doi:10.1016/j.redox.2020.101702), 2020-08-27

Figure S1

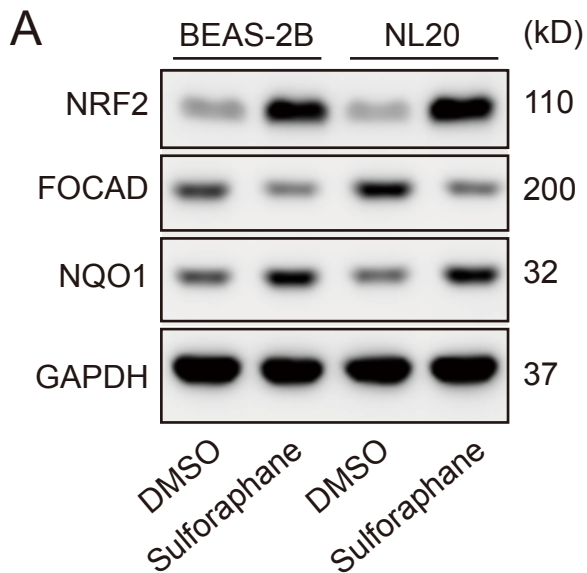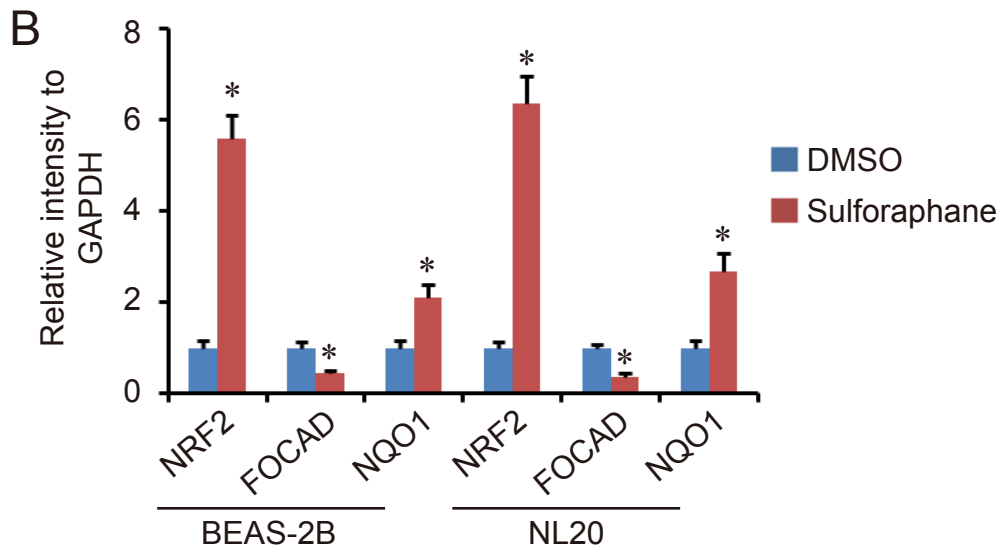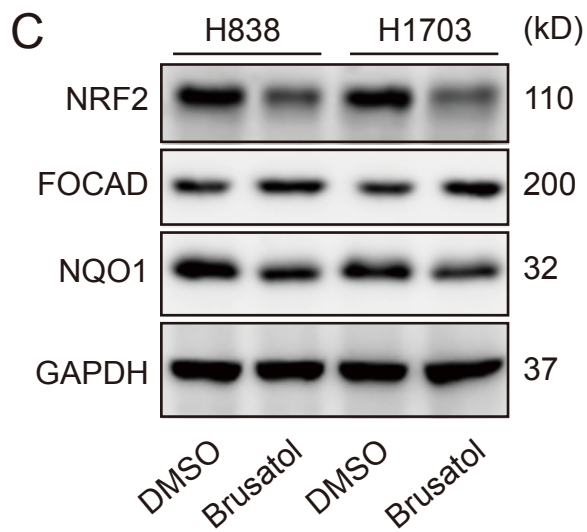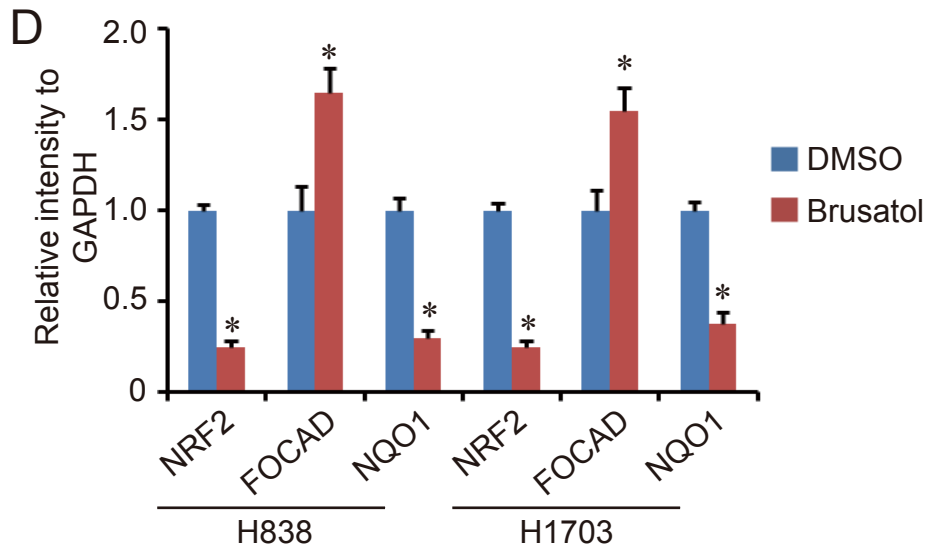

Supplement: mmc1.pdf [file mmc1.pdf]

# Figure S2

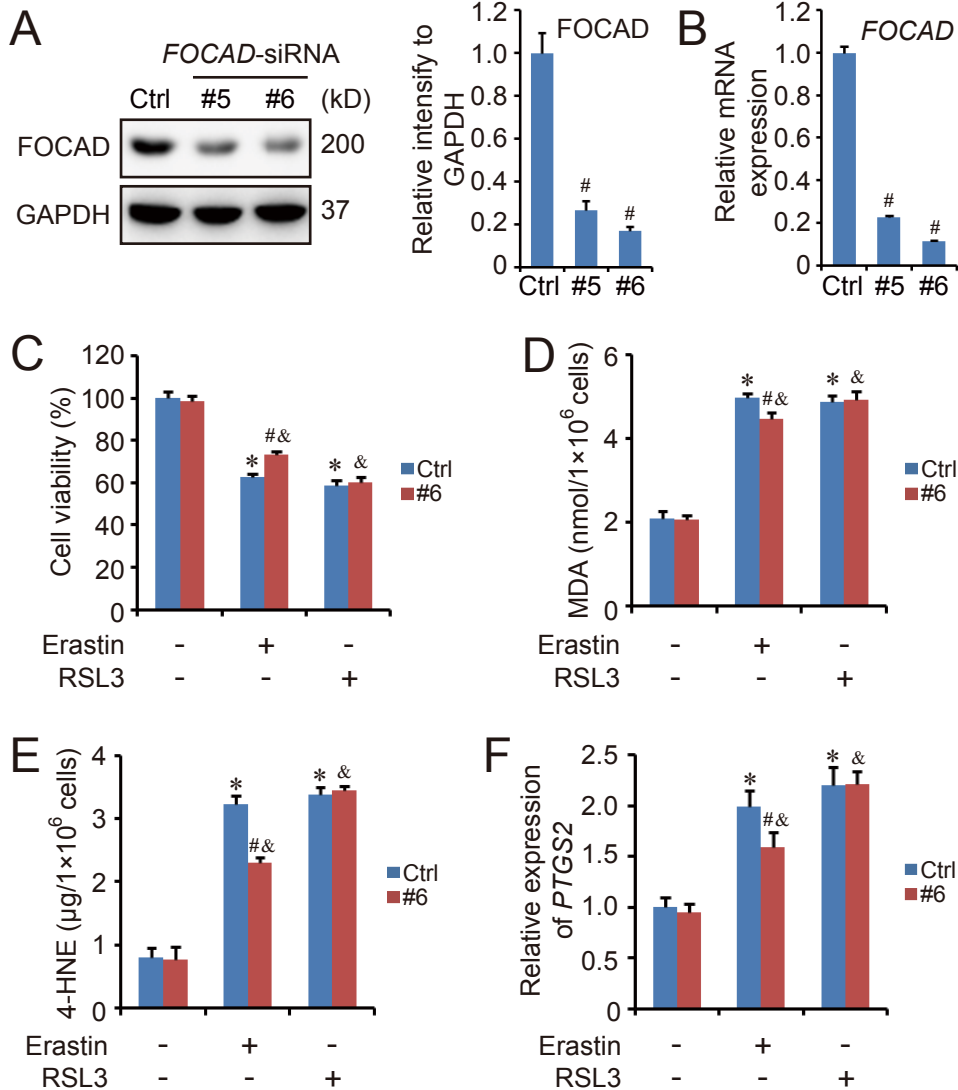

Supplement: mmc2.pdf [file mmc2.pdf]

Figure S3

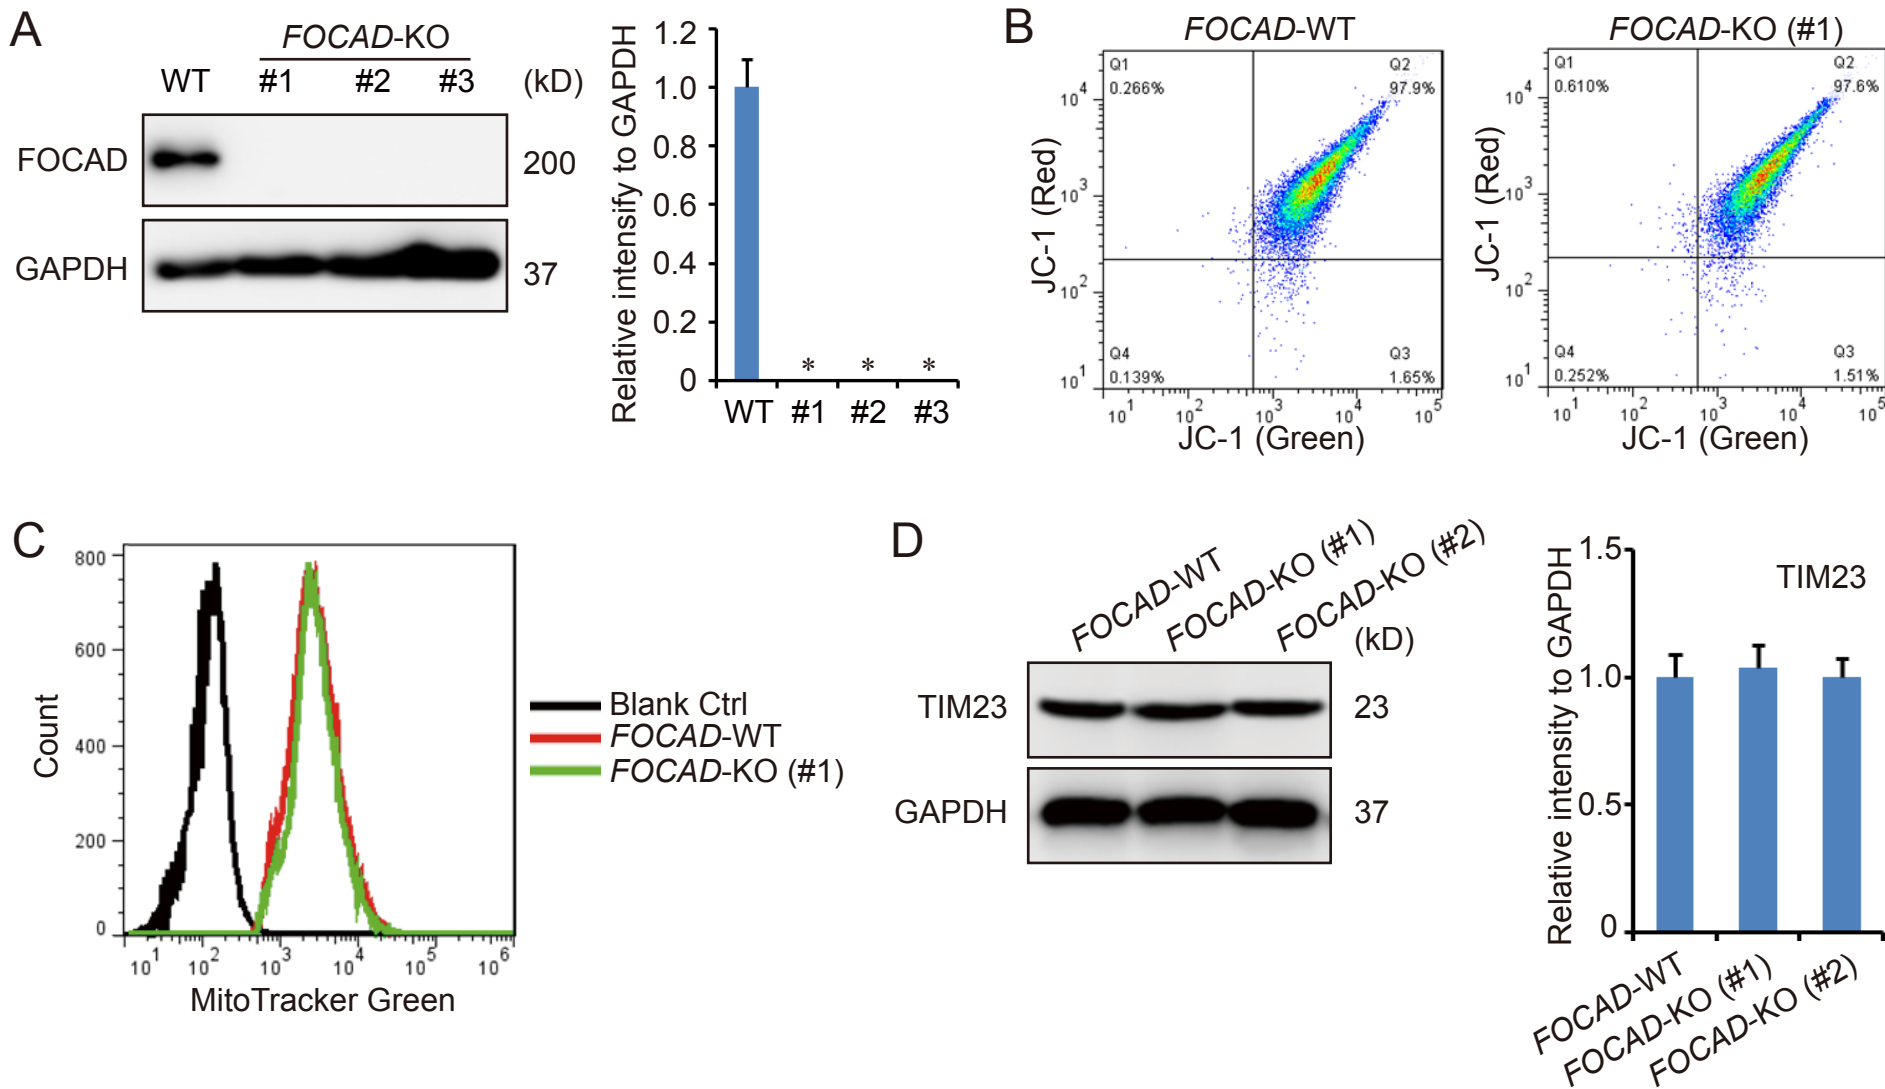

Supplement: mmc3.pdf [file mmc3.pdf]

# Figure S4

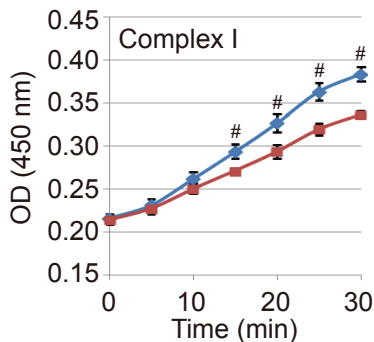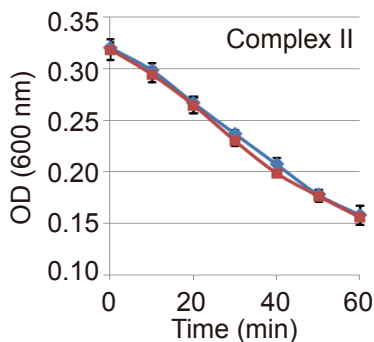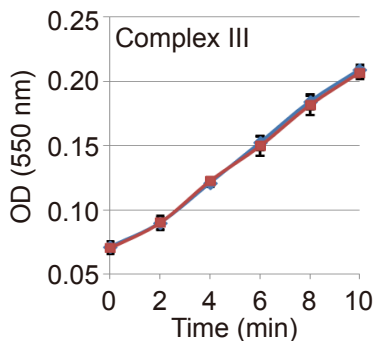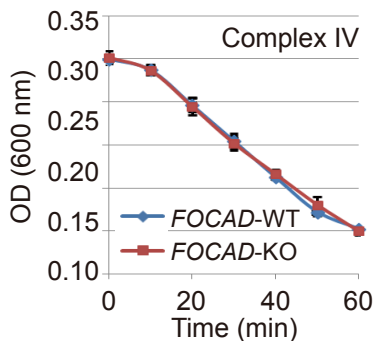

Supplement: mmc4.pdf [file mmc4.pdf]

# Figure S5

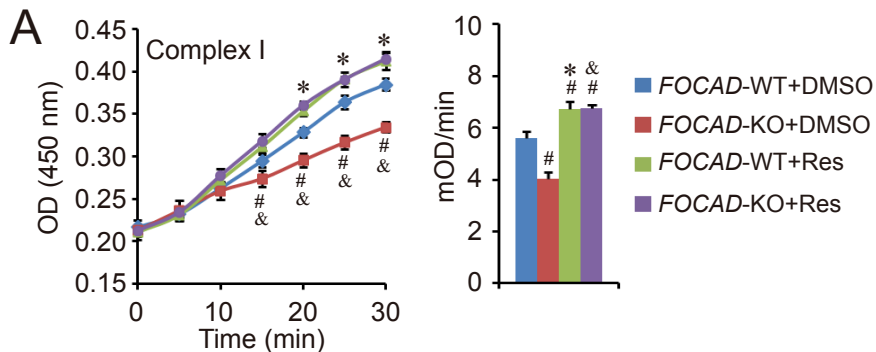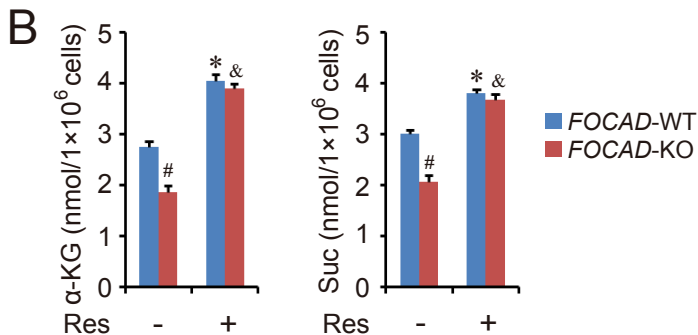

Supplement: mmc5.pdf [file mmc5.pdf]

# Figure S6

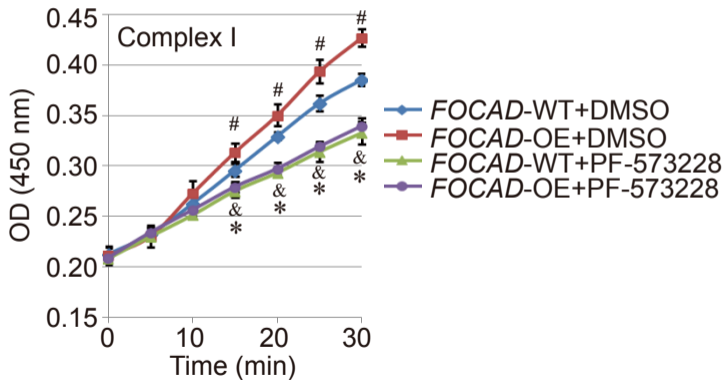

Supplement: mmc6.pdf [file mmc6.pdf]

# Figure S7

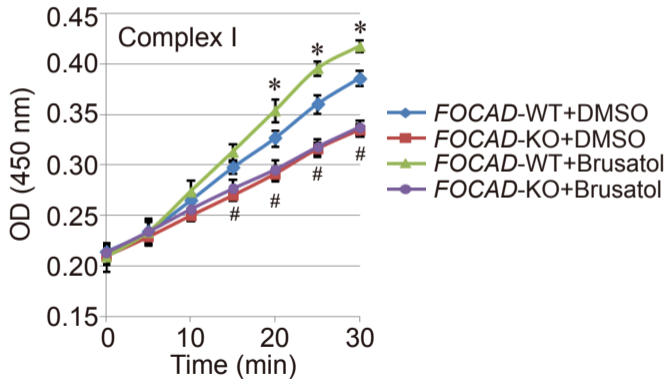

Supplement: mmc7.pdf [file mmc7.pdf]

Figure S8

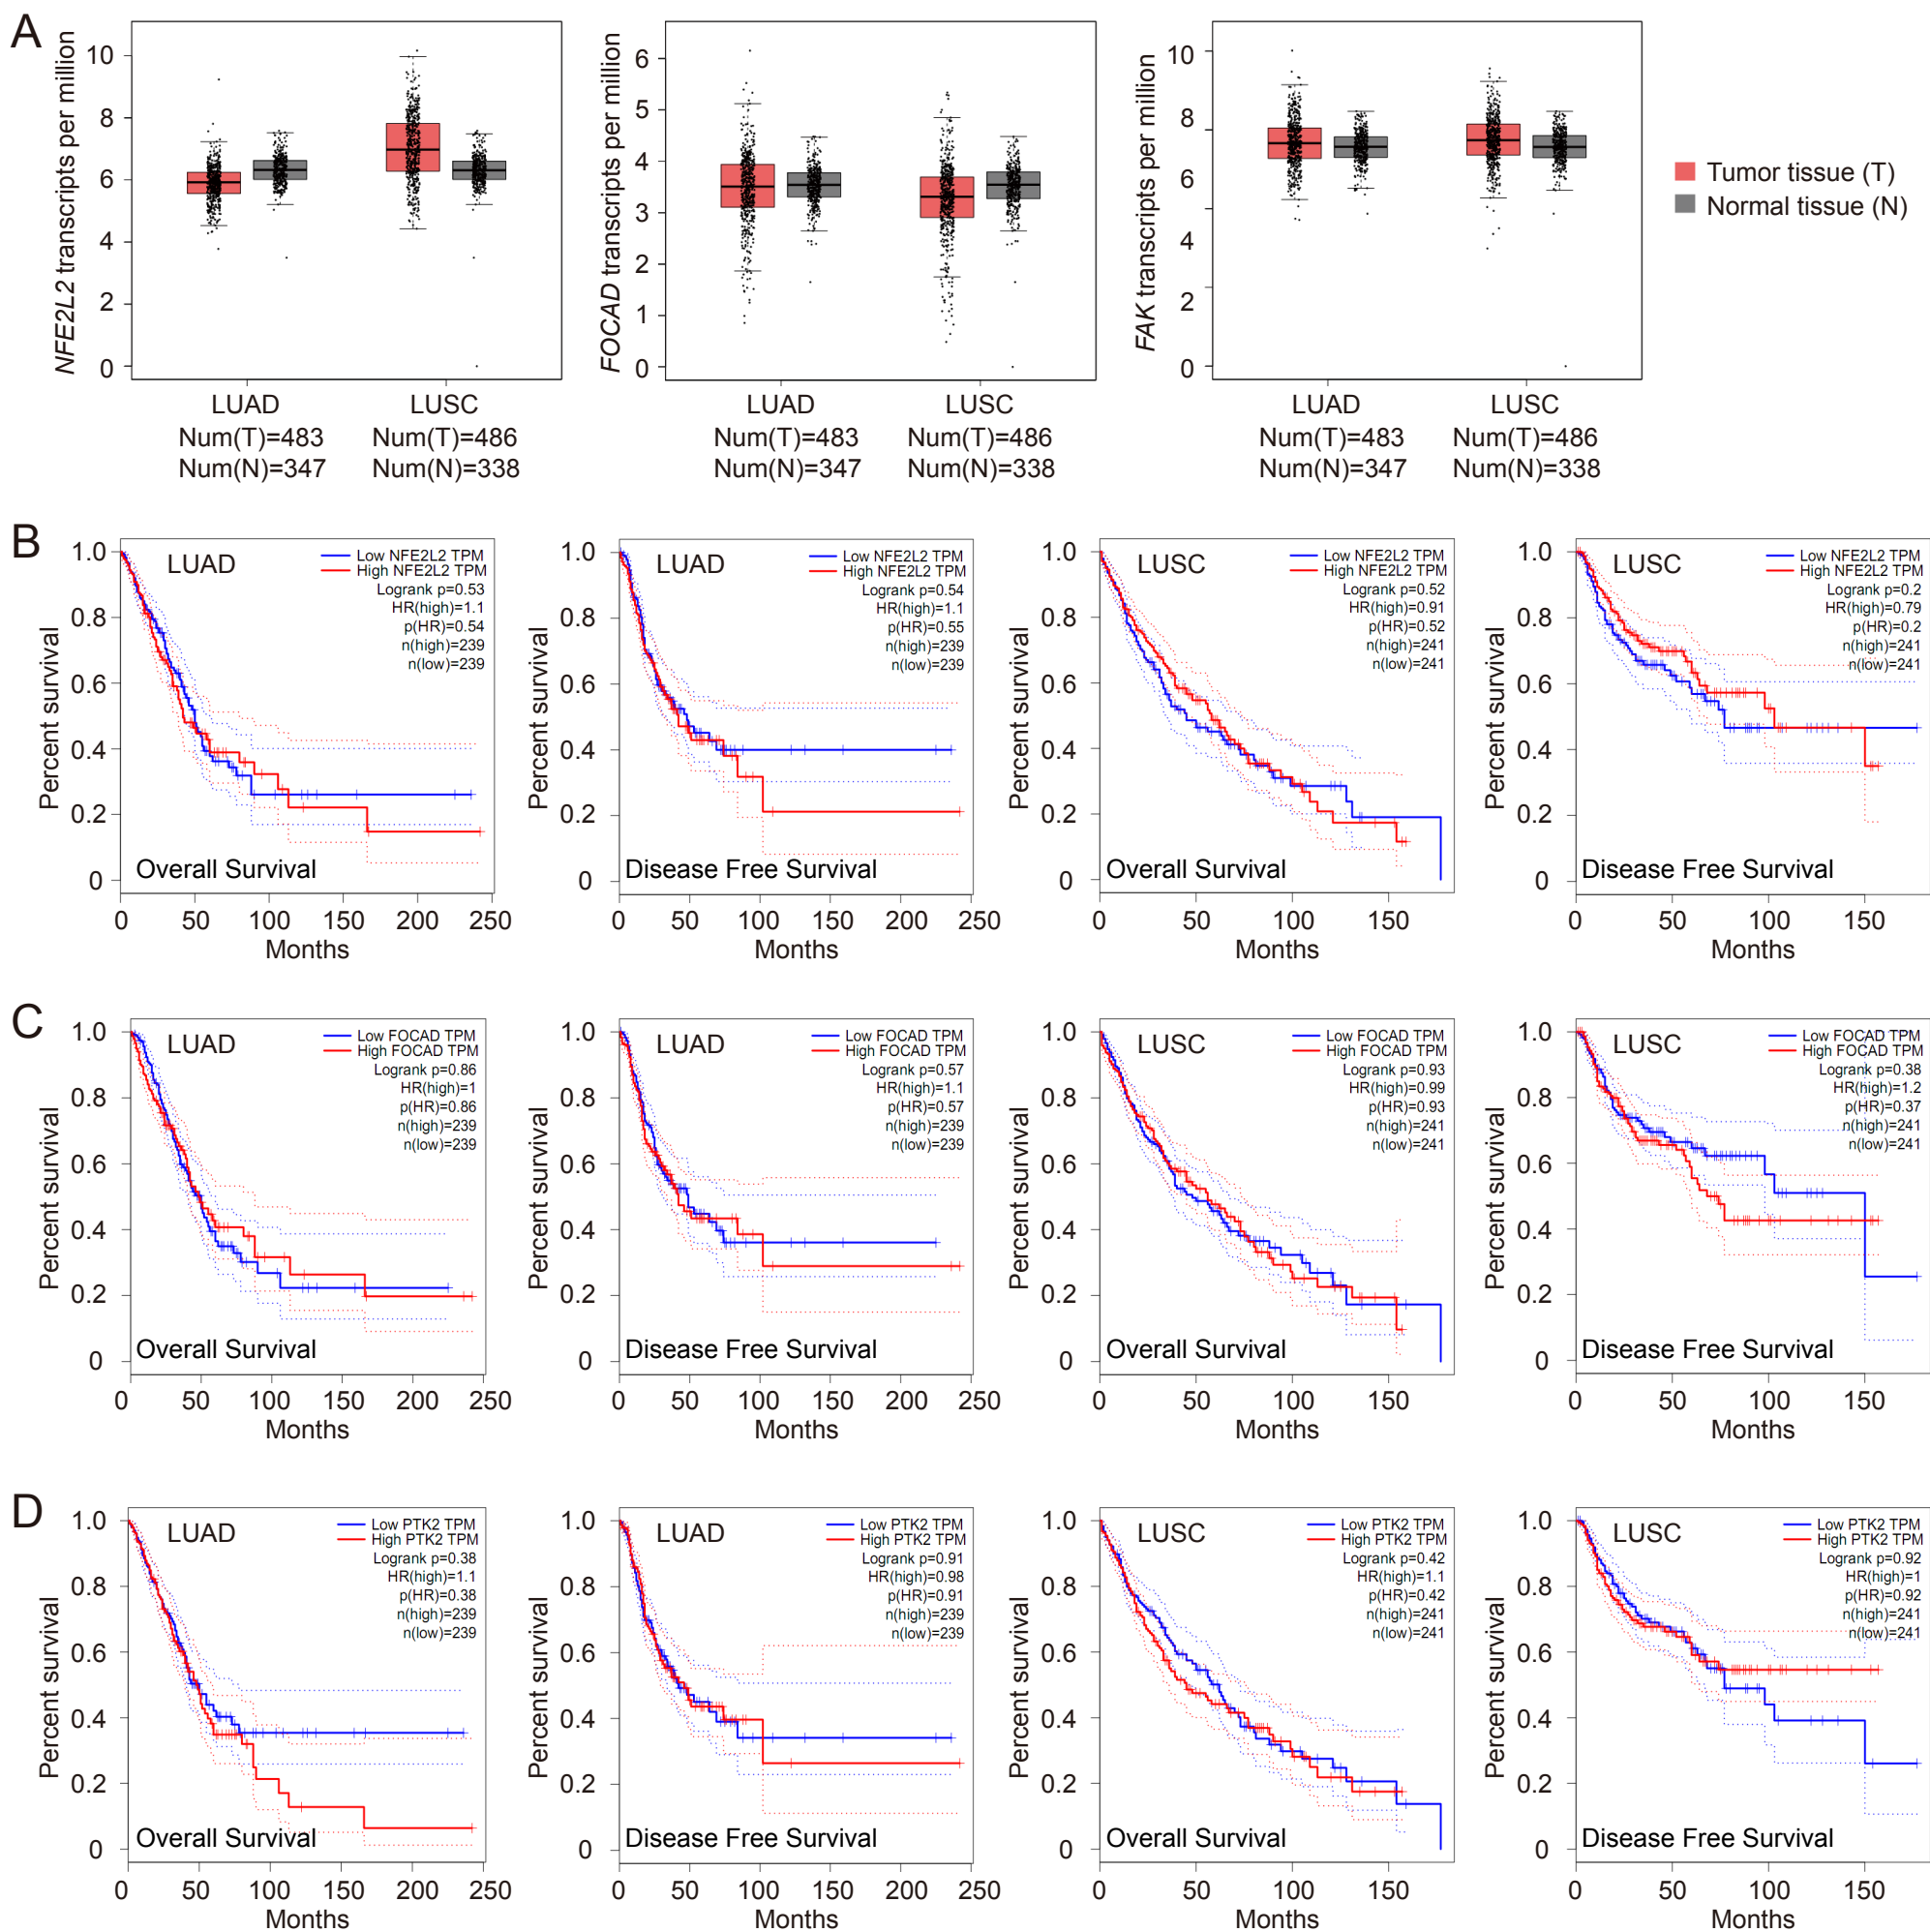

Supplement: mmc8.pdf [file mmc8.pdf]
